# Supplementary material for: Tailoring hydrogel degradation and drug release via neighboring amino acid controlled esterhydrolysis
Source: Royal Society of Chemistry journal article supplement (doi:10.1039/b814584a), 2008-11-10
Supplement: b814584a.pdf [file b814584a.pdf]

## For Electronic Supplementary Information (ESI)

### Tailoring hydrogel degradation and drug release via neighboring amino acid-controlled ester hydrolysis†

5

Yun Suk Jo<sup>a</sup>, Jay Gantz<sup>a</sup>, Jeffrey A. Hubbell<sup>a,b</sup> and Matthias P. Lutolf<sup>\*a</sup>

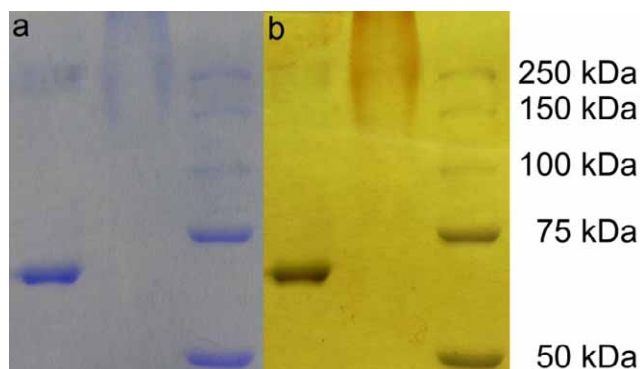

10

Fig. S1. SDS PAGE to detect BSA conjugation by the heterofunctional NHS-PEG-acrylate linker. Coomassie blue staining (a) and barium iodide staining (b). (Lane 1: BSA, Lane 2: BSA-PEG-acrylate, Lane 3: protein standards.)

15

<sup>a</sup>Institute of Bioengineering (IBI), École Polytechnique Fédérale de Lausanne (EPFL), Lausanne 1015, Switzerland. Tel: +41 21 693 1876; Fax: +41 21 693 9665; E-mail: [matthias.lutolf@epfl.ch](mailto:matthias.lutolf@epfl.ch)

<sup>b</sup>Institute of Chemical Sciences and Engineering (ISIC), École Polytechnique Fédérale de Lausanne (EPFL), Lausanne 1015, Switzerland.
